# Supplementary material for: Potential anti-bacterial agents: montmorillonite clay-catalyzed synthesis of novel 2-(3,5-substituted-1H-pyrazol-1-yl)-3-substituted quinolines and their in silico molecular docking studies
Source: Royal Society of Chemistry journal article supplement (doi:10.1039/c4ra10534f), 2014-01-01
Supplement: c4ra10534f1.pdf [file c4ra10534f1.pdf]

## Potential anti-bacterial agents: Montmorillonite Clay catalyzed synthesis of novel 2-(3, 5-substituted-1*H*-pyrazol-1-yl)-3-substituted quinolones and their in-silico molecular docking studies

Pasupala Pavan, R. Subashini\*, K. R. Ethiraj and Fazlur-Rahman Nawaz Khan\*

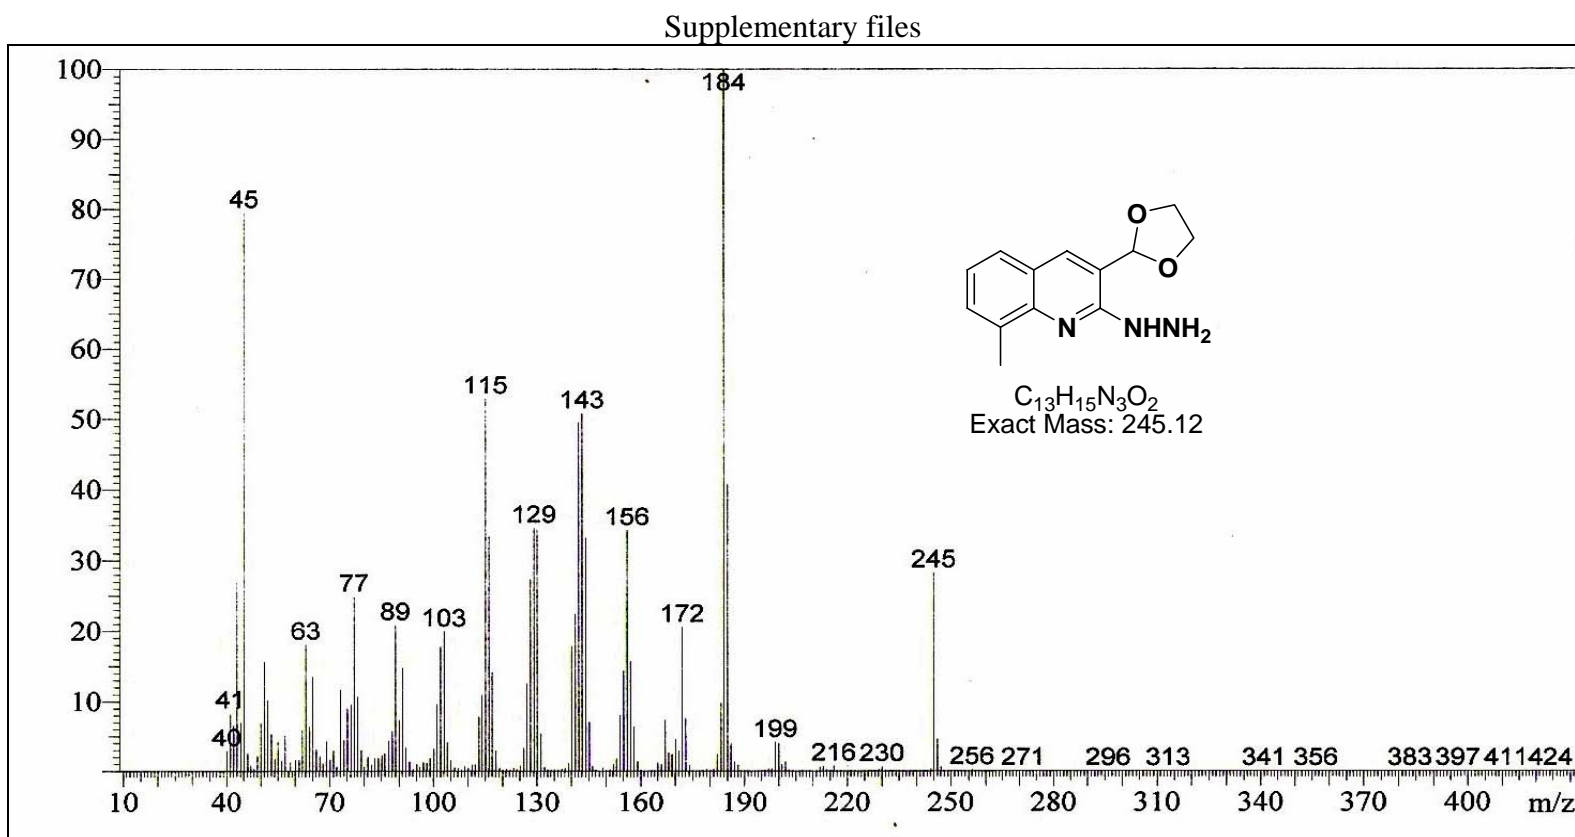

Fig. 1: GC-MS spectrum of 1-(3-(1,3-dioxolan-2-yl)-8-methylquinolin-2-yl)hydrazine, **2e**

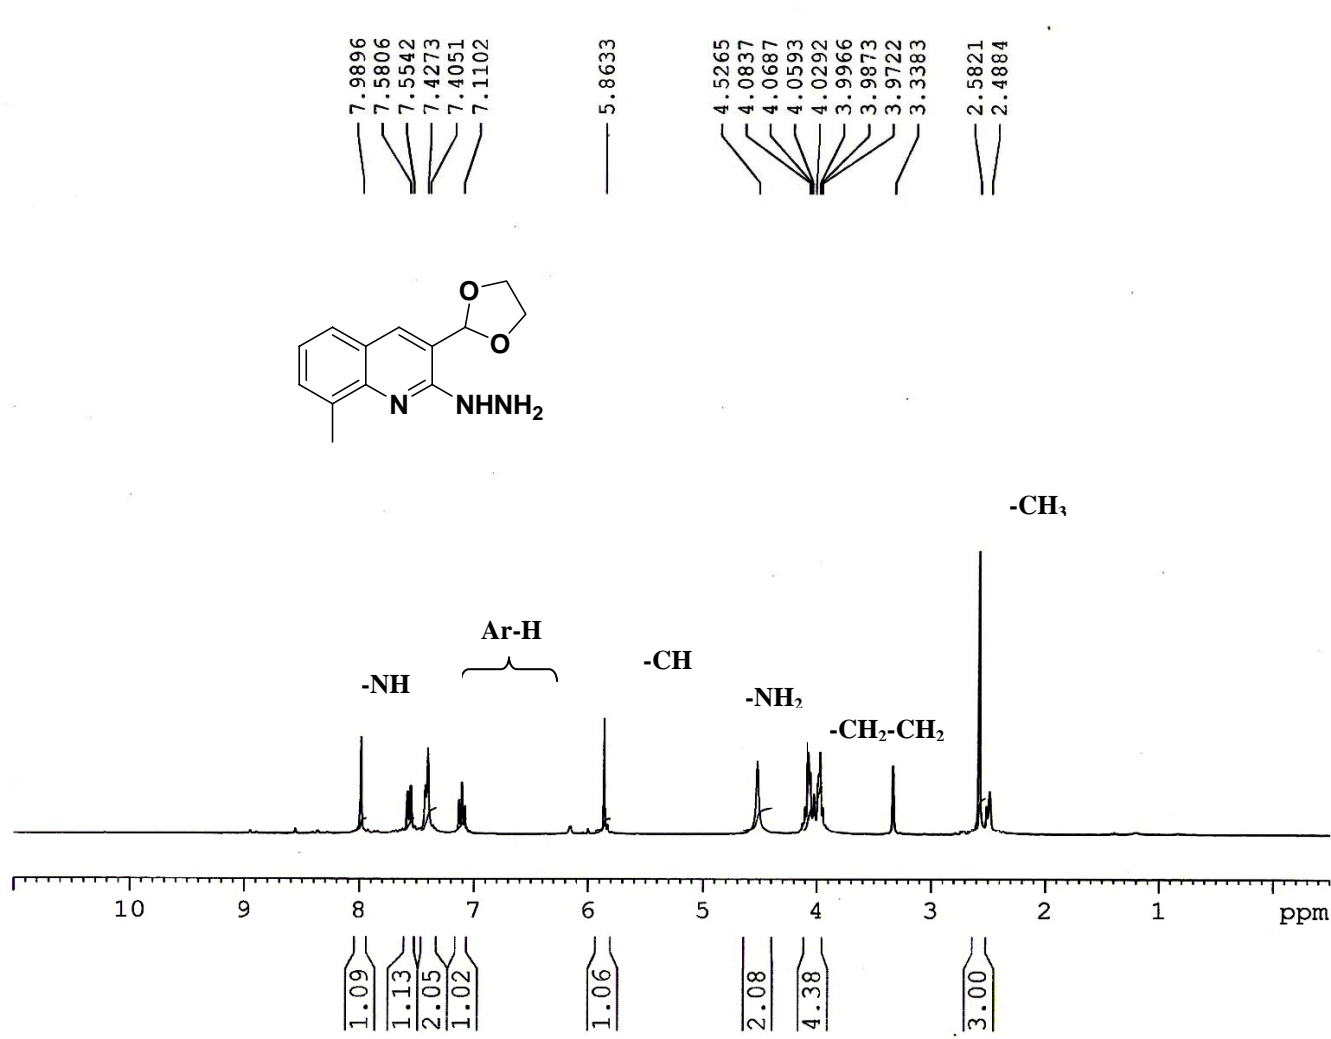

Current Data Parameters  
 NAME GI821553-8107010  
 EXPNO 1  
 PROCNO 1

F2 - Acquisition Parameters  
 Date\_ 20080528  
 Time\_ 20.46  
 INSTRUM spect  
 PROBHD 5 mm DUL BB-1H  
 PULPROG zg30  
 TD 32768  
 SOLVENT DMSO  
 NS 8  
 DS 2  
 SWH 7183.908 Hz  
 FIDRES 0.219235 Hz  
 AQ 2.2807028 sec  
 RG 362  
 DW 69.600 usec  
 DE 6.00 usec  
 TE 0.0 K  
 D1 2.00000000 sec  
 MCREST 0.00000000 sec  
 MCWRK 0.01500000 sec

==== CHANNEL f1 =====  
 NUC1 1H  
 P1 10.30 usec  
 PL1 0.00 dB  
 SFO1 300.1327012 MHz

F2 - Processing parameters  
 SI 32768  
 SF 300.1300044 MHz  
 WDW EM  
 SSB 0  
 LB 0.30 Hz  
 GB 0  
 PC 1.40

Fig. 2: <sup>1</sup>H NMR spectrum of 1-(3-(1,3-dioxolan-2-yl)-8-methylquinolin-2-yl)hydrazine, **2e**

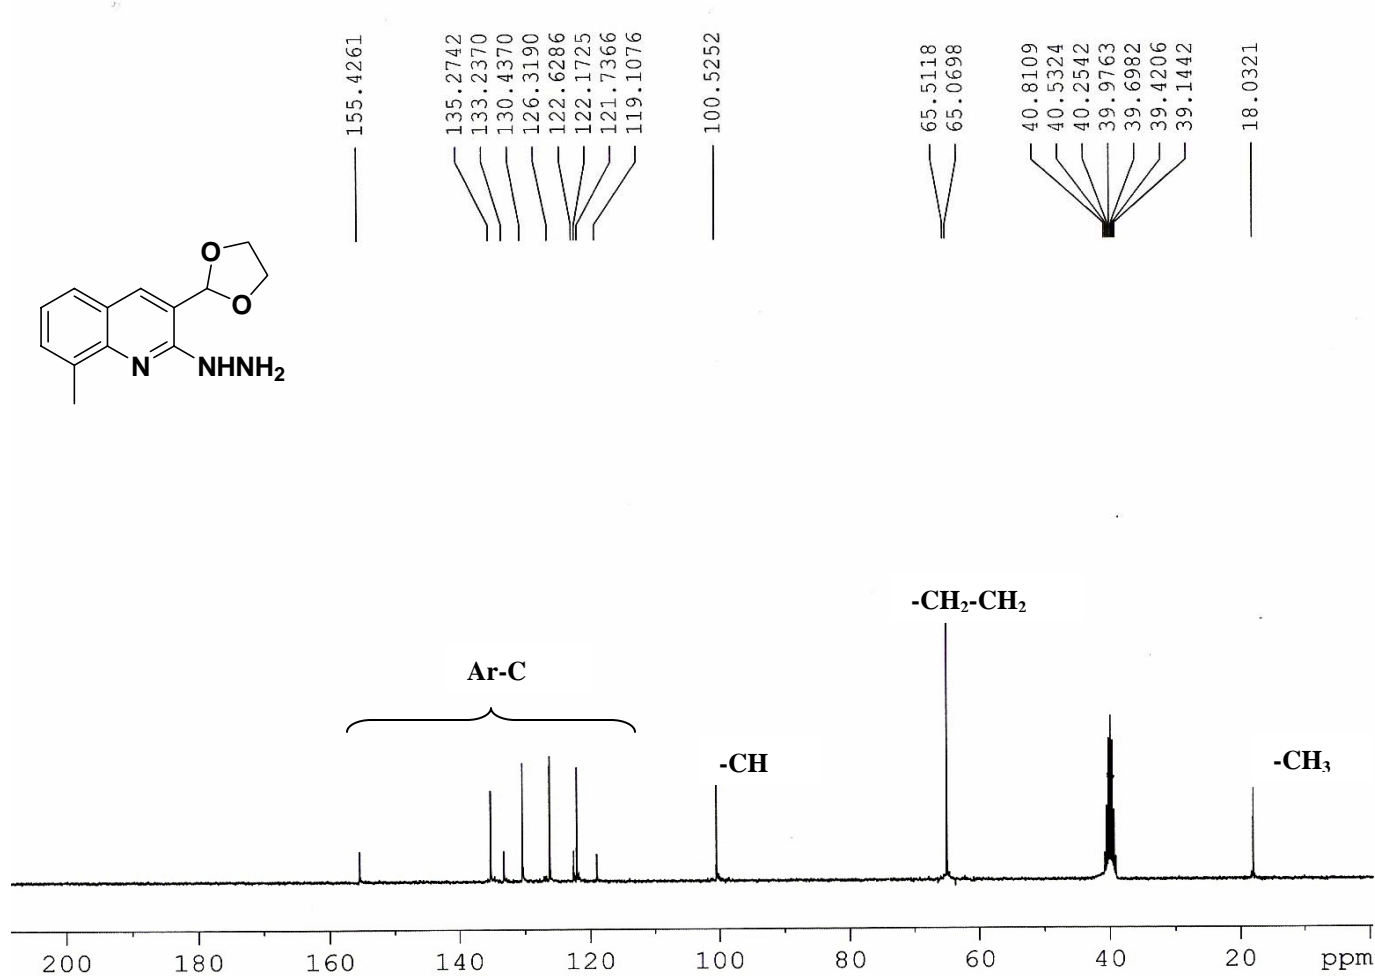

Current Data Parameters  
 NAME GI821553-8107010  
 EXPNO 2  
 PROCNO 1

F2 - Acquisition Parameters  
 Date\_ 20080528  
 Time 22.03  
 INSTRUM spect  
 PROBHD 5 mm DUL BB-1H  
 PULPROG zgpg  
 TD 32768  
 SOLVENT DMSO  
 NS 2000  
 DS 0  
 SWH 18115.941 Hz  
 FIDRES 0.552855 Hz  
 AQ 0.9044468 sec  
 RG 90.5  
 DW 27.600 usec  
 DE 6.00 usec  
 TE 0.0 K  
 D1 2.00000000 sec  
 d11 0.03000000 sec  
 DELTA 1.89999998 sec  
 MCREST 0.00000000 sec  
 MCWRK 0.01500000 sec

===== CHANNEL f1 =====  
 NUC1 13C  
 P1 7.75 usec  
 PL1 0.00 dB  
 SFO1 75.4752958 MHz

===== CHANNEL f2 =====  
 CPDPRG2 waltz16  
 NUC2 1H  
 PCPD2 80.00 usec  
 PL2 0.00 dB  
 PL12 17.81 dB  
 PL13 18.00 dB  
 SFO2 300.1312005 MHz

F2 - Processing parameters  
 SI 131072  
 SF 75.4677490 MHz  
 WDW EM  
 SSB 0  
 LB 1.00 Hz  
 GB 0  
 PC 2.00

**Fig. 3:** <sup>13</sup>C NMR spectrum of 1-(3-(1,3-dioxolan-2-yl)-8-methylquinolin-2-yl)hydrazine, **2e**

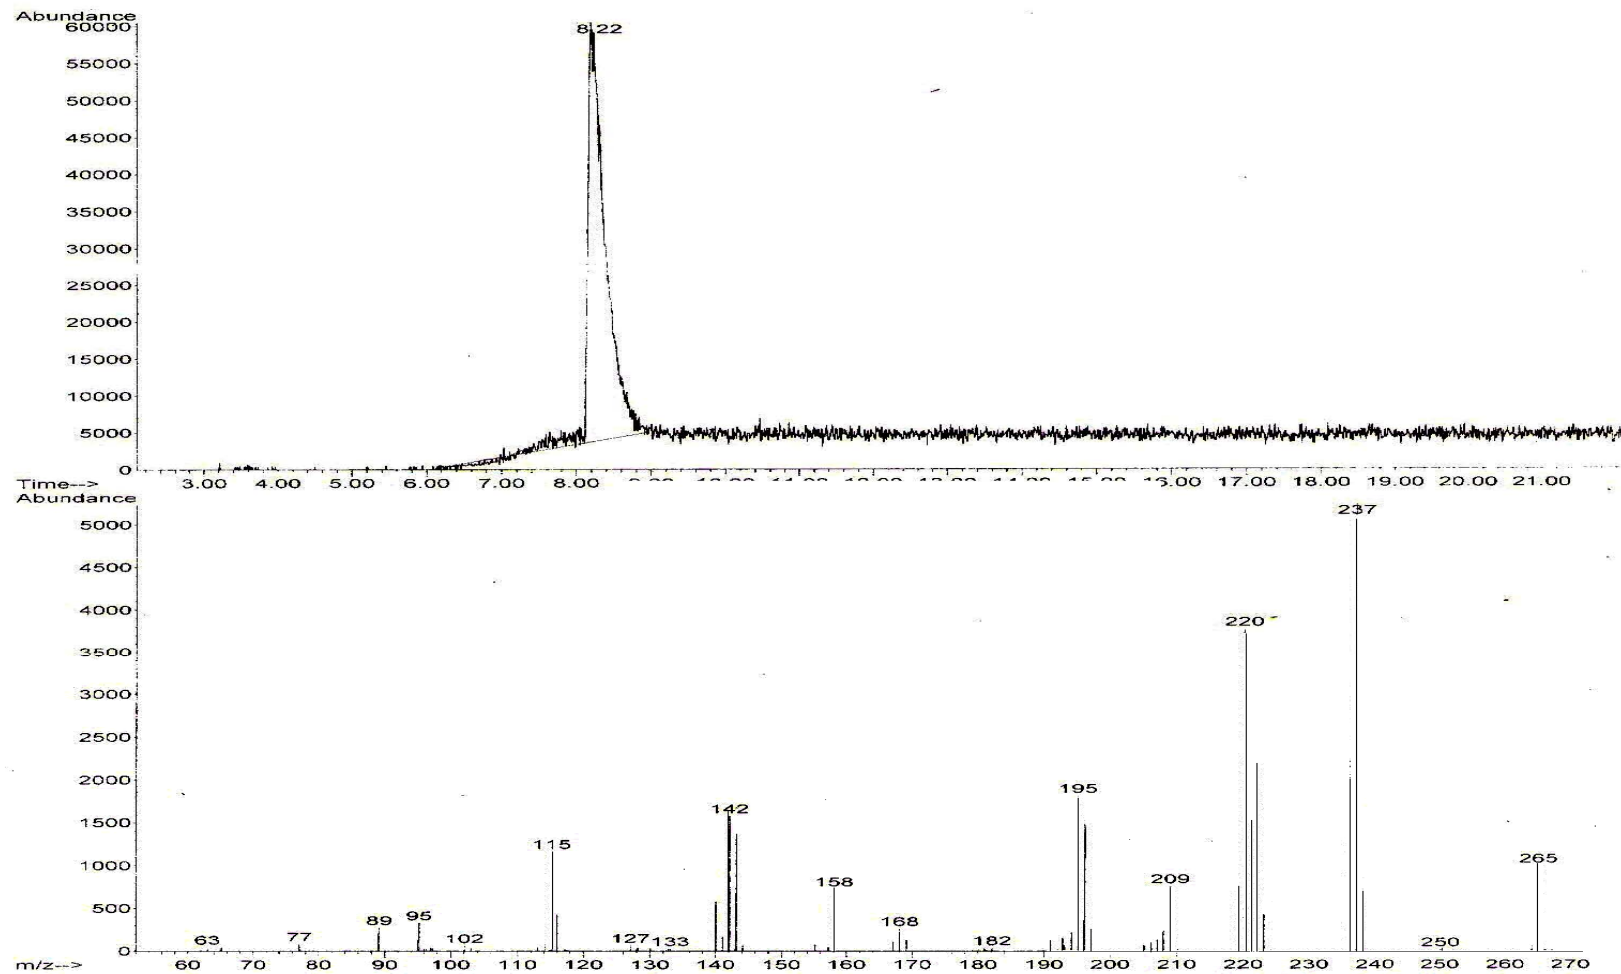

**Fig. 4:** GC-MS spectrum of 2-pyrazoloquinoline-3-carbaldehyde, 4

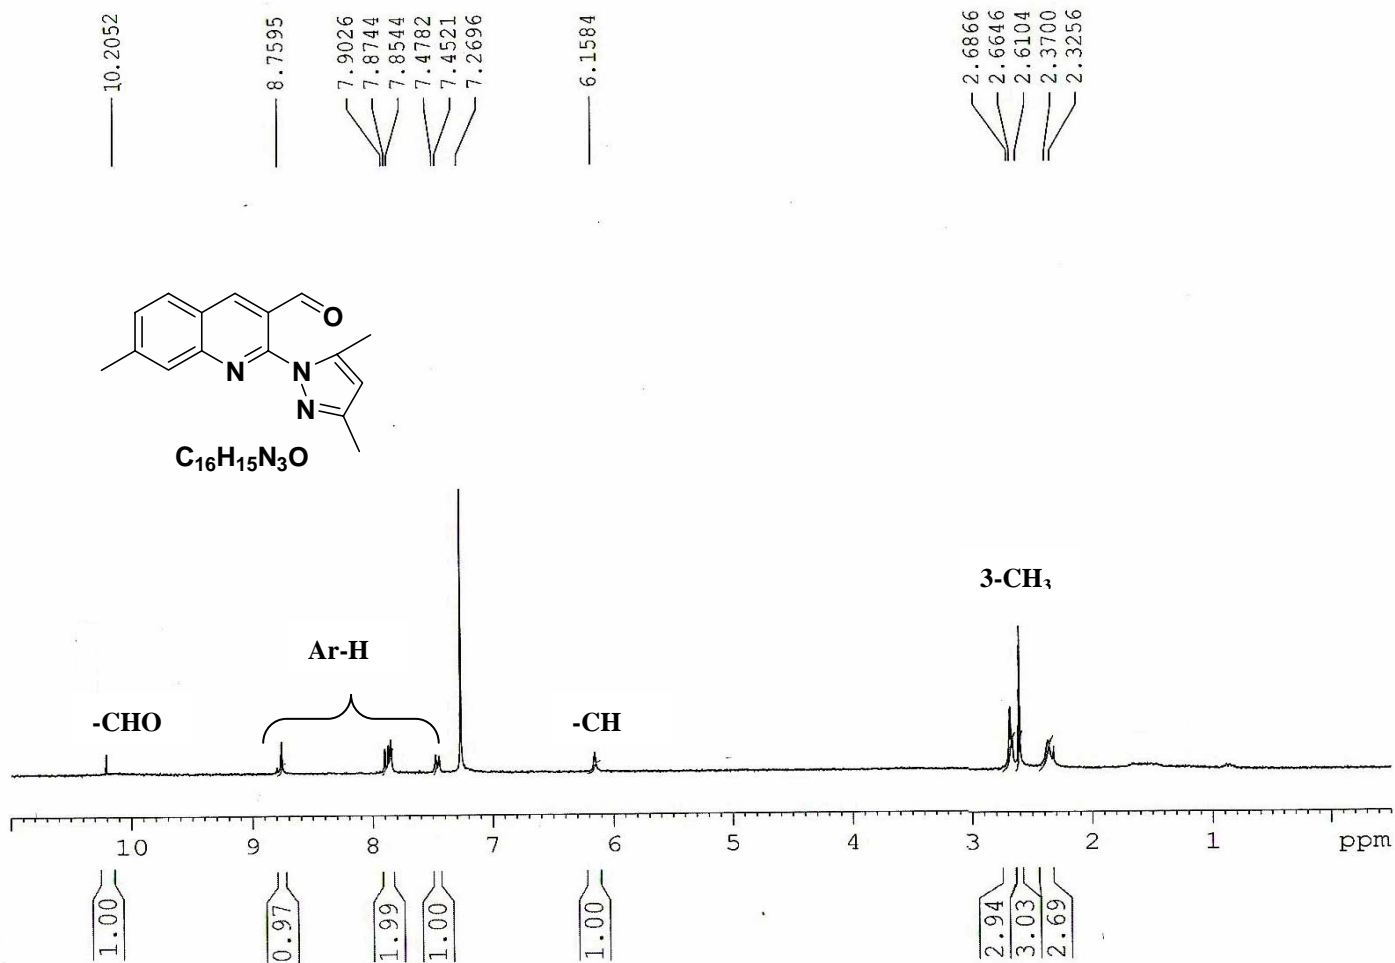

Current Data Parameters  
 NAME GI800234-8038742  
 EXPNO 1  
 PROCNO 1

F2 - Acquisition Parameters  
 Date\_ 20080225  
 Time 21.00  
 INSTRUM spect  
 PROBHD 5 mm DUL BB-1H  
 PULPROG zg30  
 TD 32768  
 SOLVENT CDCl3  
 NS 8  
 DS 2  
 SWH 7183.908 Hz  
 FIDRES 0.219235 Hz  
 AQ 2.2807028 sec  
 RG 812.7  
 DW 69.600 usec  
 DE 6.00 usec  
 TE 0.0 K  
 D1 2.00000000 sec  
 MCREST 0.00000000 sec  
 MCWRK 0.01500000 sec

==== CHANNEL f1 =====  
 NUC1 1H  
 P1 10.30 usec  
 PL1 0.00 dB  
 SFO1 300.1327012 MHz

F2 - Processing parameters  
 SI 32768  
 SF 300.1298168 MHz  
 WDW EM  
 SSB 0  
 LB 0.30 Hz  
 GB 0  
 PC 1.40

Fig. 5: <sup>1</sup>H-NMR spectrum of 2-pyrazoloquinoline-3-carbaldehyde, 4

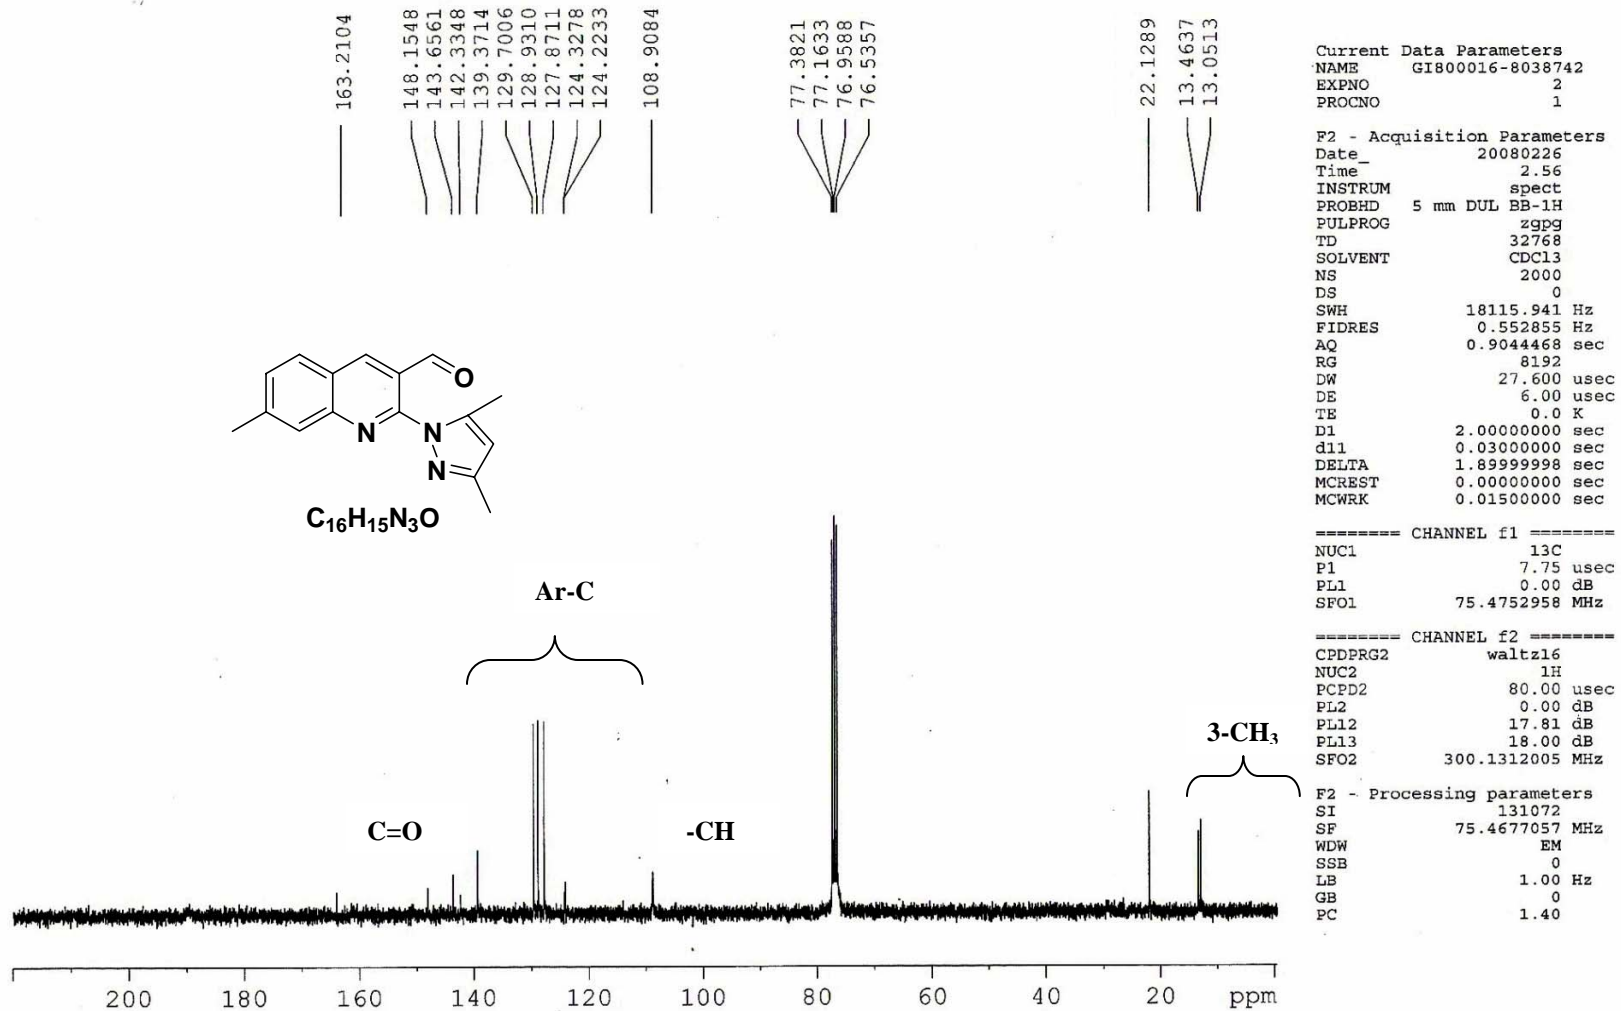

**Fig. 6:** <sup>13</sup>C-NMR spectrum of 2-pyrazoloquinoline-3-carbaldehyde, **4**

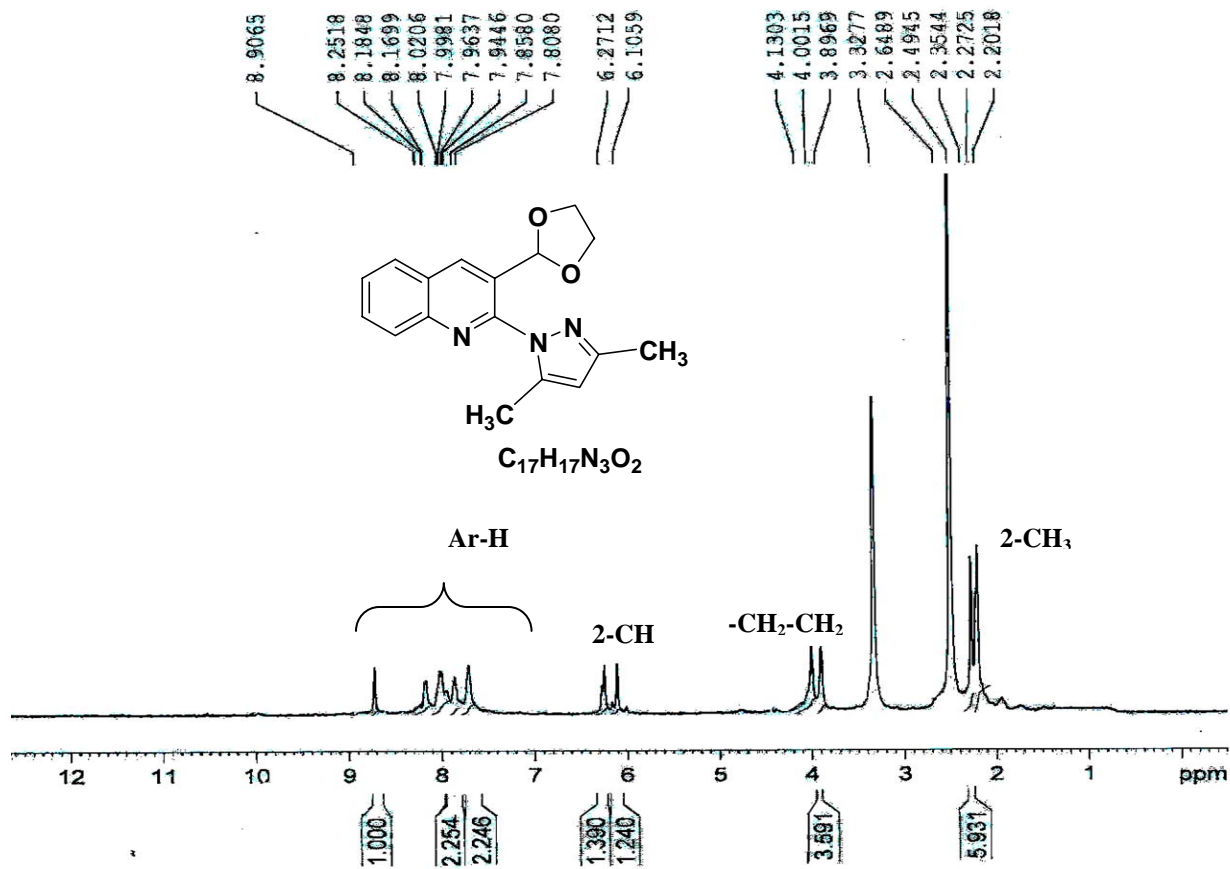

Current Data Parameters  
 NAME SS081\_GI929792-9151065-3  
 EXPNO 1  
 PROCNO 1

F2 - Acquisition Parameters  
 Date\_ 20090619  
 Time 20.23  
 INSTRUM spect  
 PROBRD 5 mm PABBO RB-  
 PULPROG zg30  
 TD 32768  
 SOLVENT DMSO  
 NS 8  
 DS 2  
 SWH 9615.385 Hz  
 FIDRES 0.293438 Hz  
 AQ 1.7039869 sec  
 RG 645  
 DW 52.000 usec  
 DE 6.00 usec  
 TE 295.2 K  
 EI 2.00000000 sec  
 TD0 1

CHANNEL f1  
 NOC1 1R  
 P1 14.00 usec  
 PL1 0.00 dB  
 SFO1 400.1534013 MHz

F2 - Processing parameters  
 SI 32768  
 SF 400.1500000 MHz  
 WDW EM  
 SSB 0  
 LB 0.30 Hz  
 GB 0  
 PC 1.00

Fig. 7:  $^1H$ -NMR- spectrum 2-(3,5-dimethyl-1H-pyrazol-1-yl)-3-(1,3-dioxolan-2-yl)quinoline.

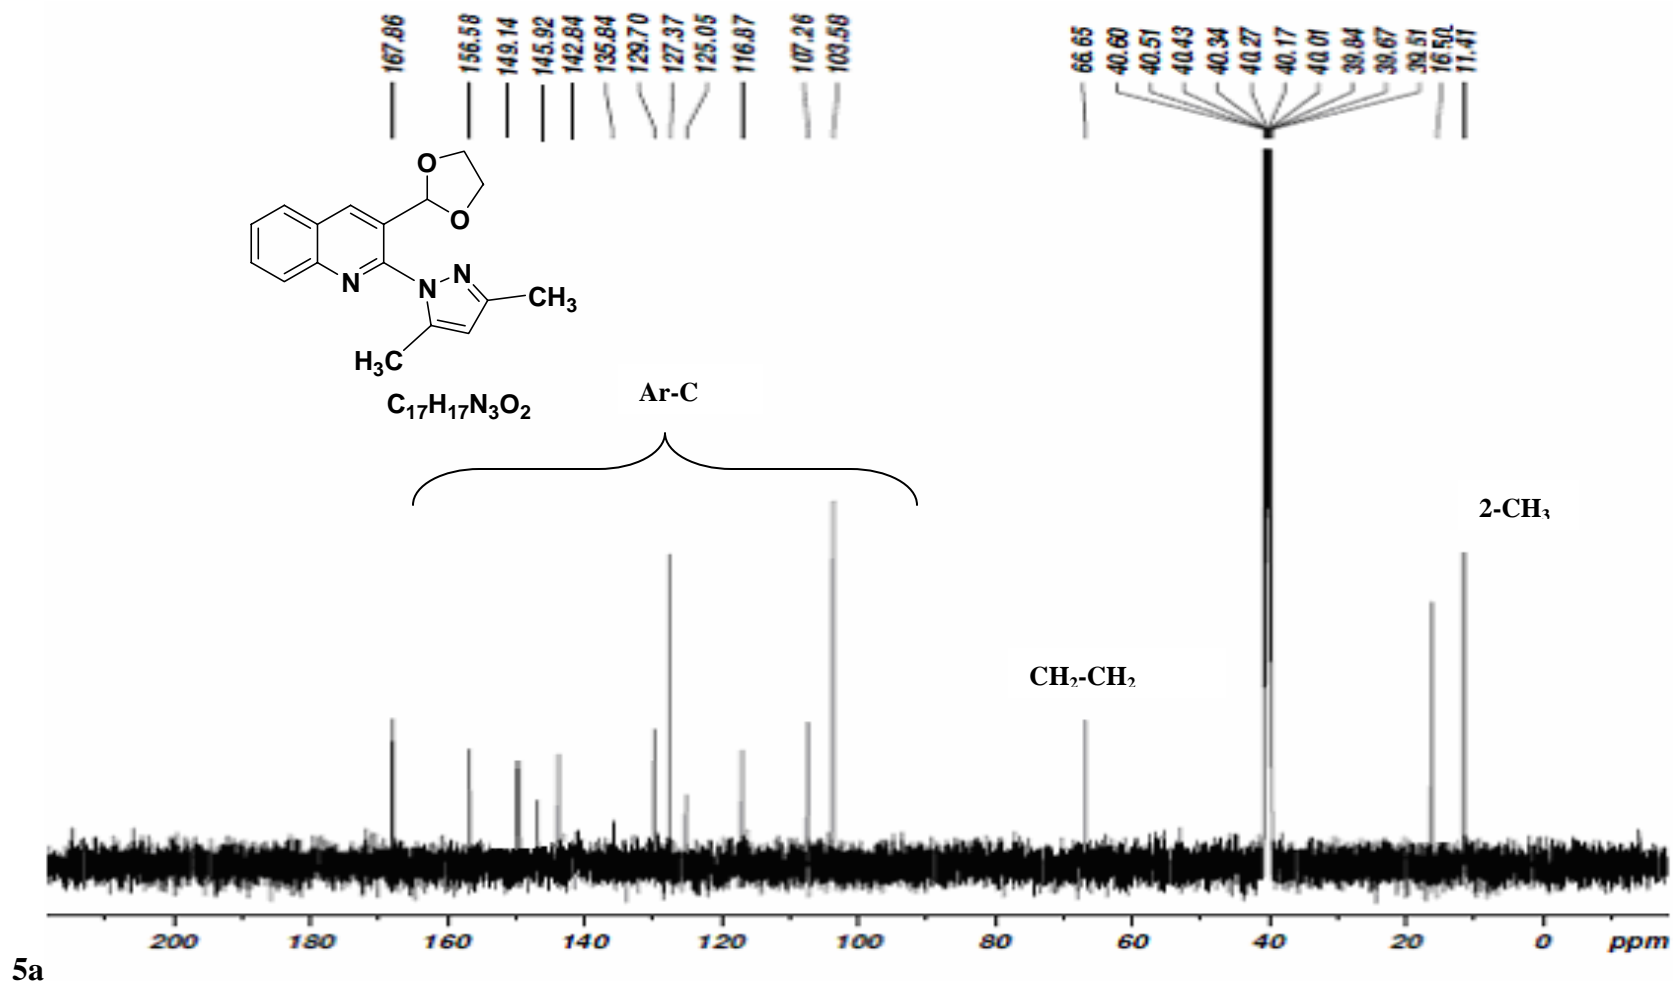

Fig. 8: <sup>13</sup>C-NMR- spectrum 2-(3,5-dimethyl-1H-pyrazol-1-yl)-3-(1,3-dioxolan-2-yl)quinoline, 5a



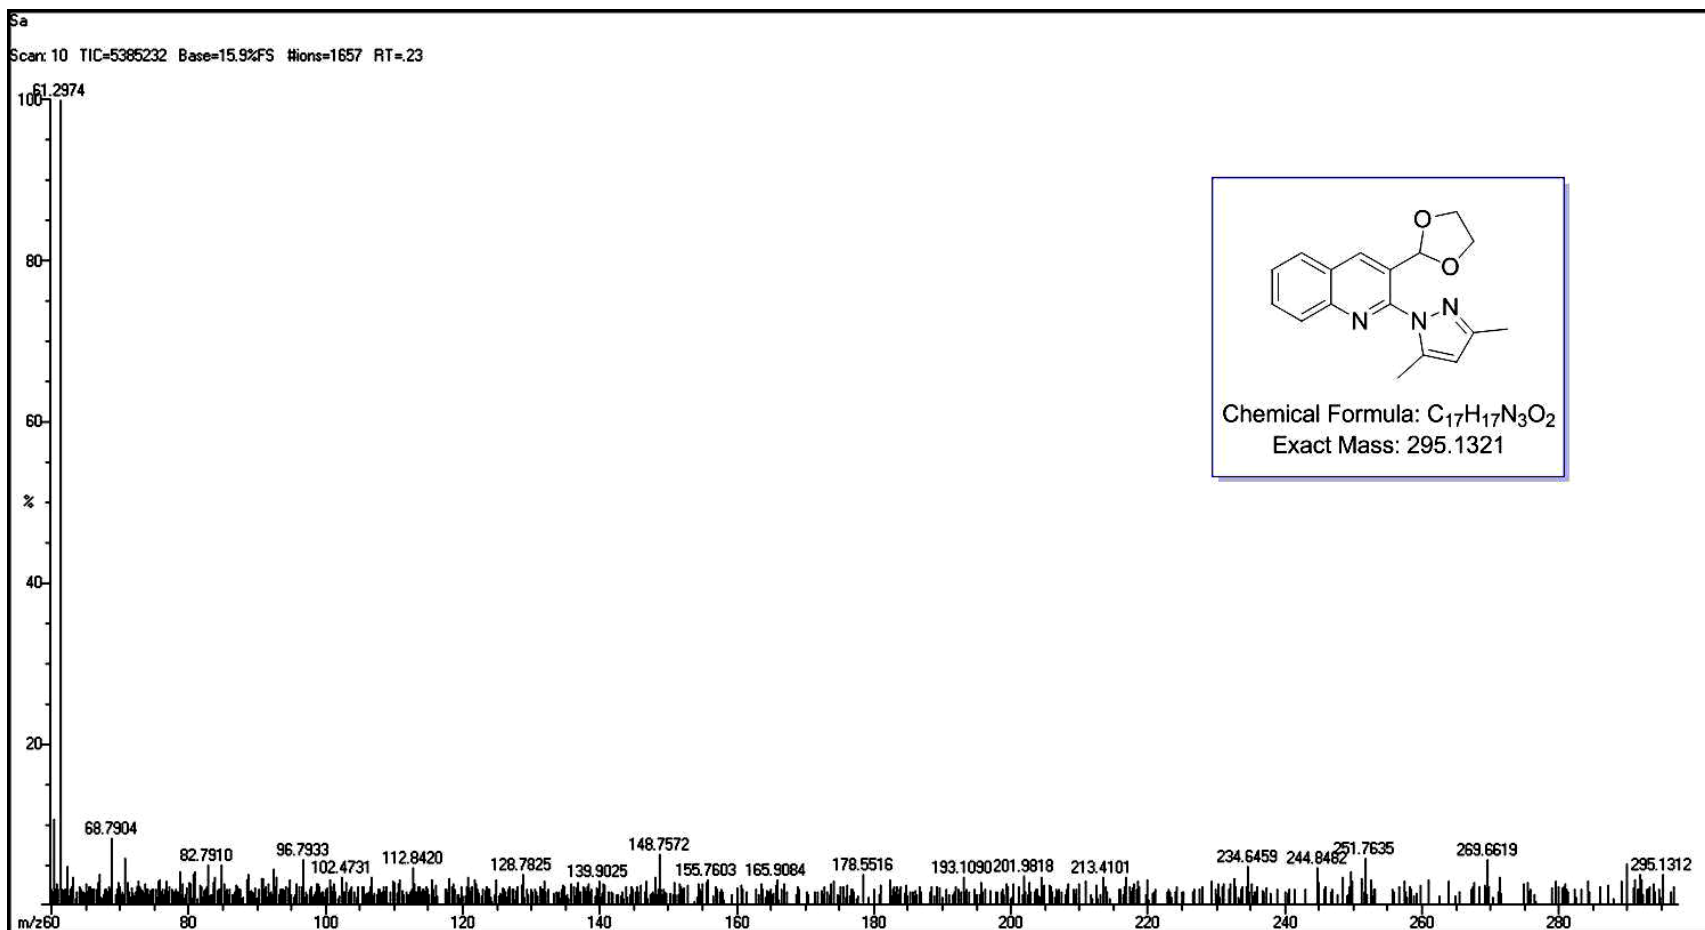

**Fig. 9:** HRMS-spectrum 2-(3,5-dimethyl-1H-pyrazol-1-yl)-3-(1,3-dioxolan-2-yl)quinoline, **5a**

Signature SIF VIT VELLORE  
5B

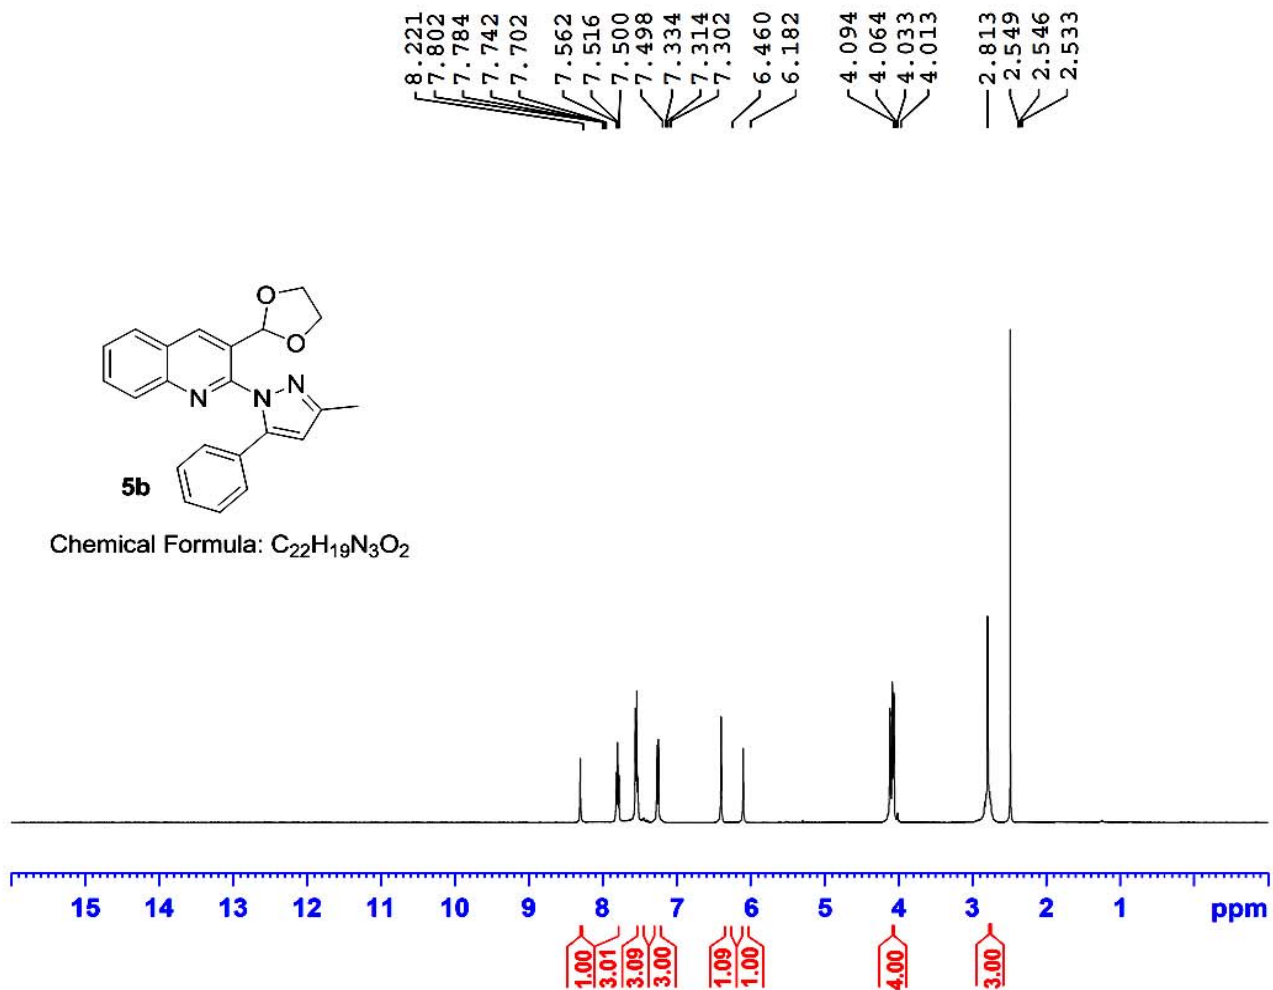

Fig. 10:  $^1H$ -NMR- spectrum of 3-(1,3-dioxolan-2-yl)-2-(3-methyl-5-phenyl-1H-pyrazol-1-yl)quinolone, **5b**

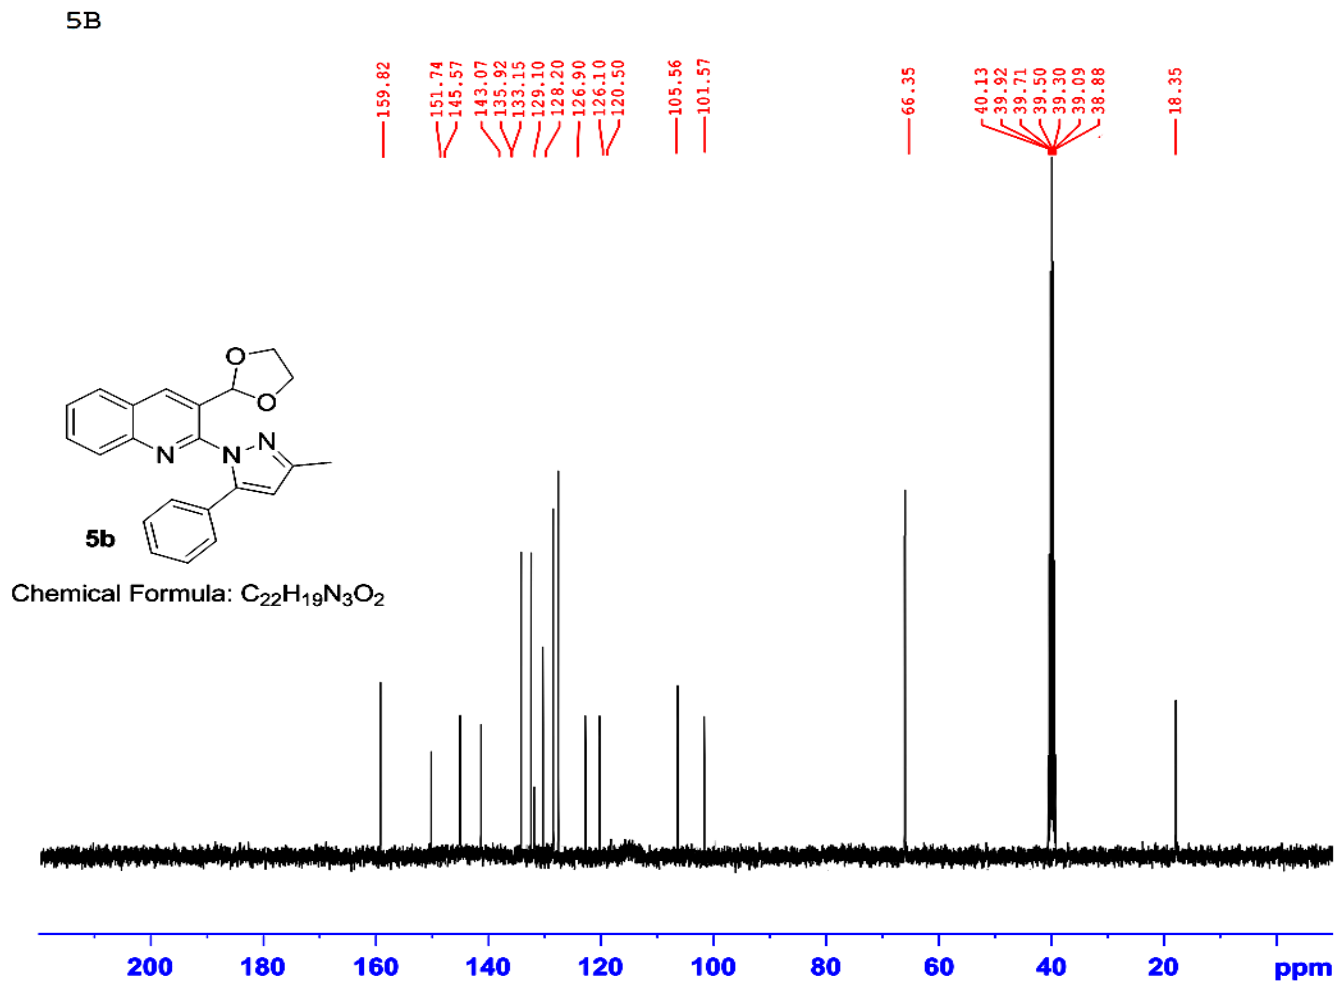

**Fig. 11:**  $^{13}C$ -NMR- spectrum of 3-(1,3-dioxolan-2-yl)-2-(3-methyl-5-phenyl-1H-pyrazol-1-yl)quinolone, **5b**

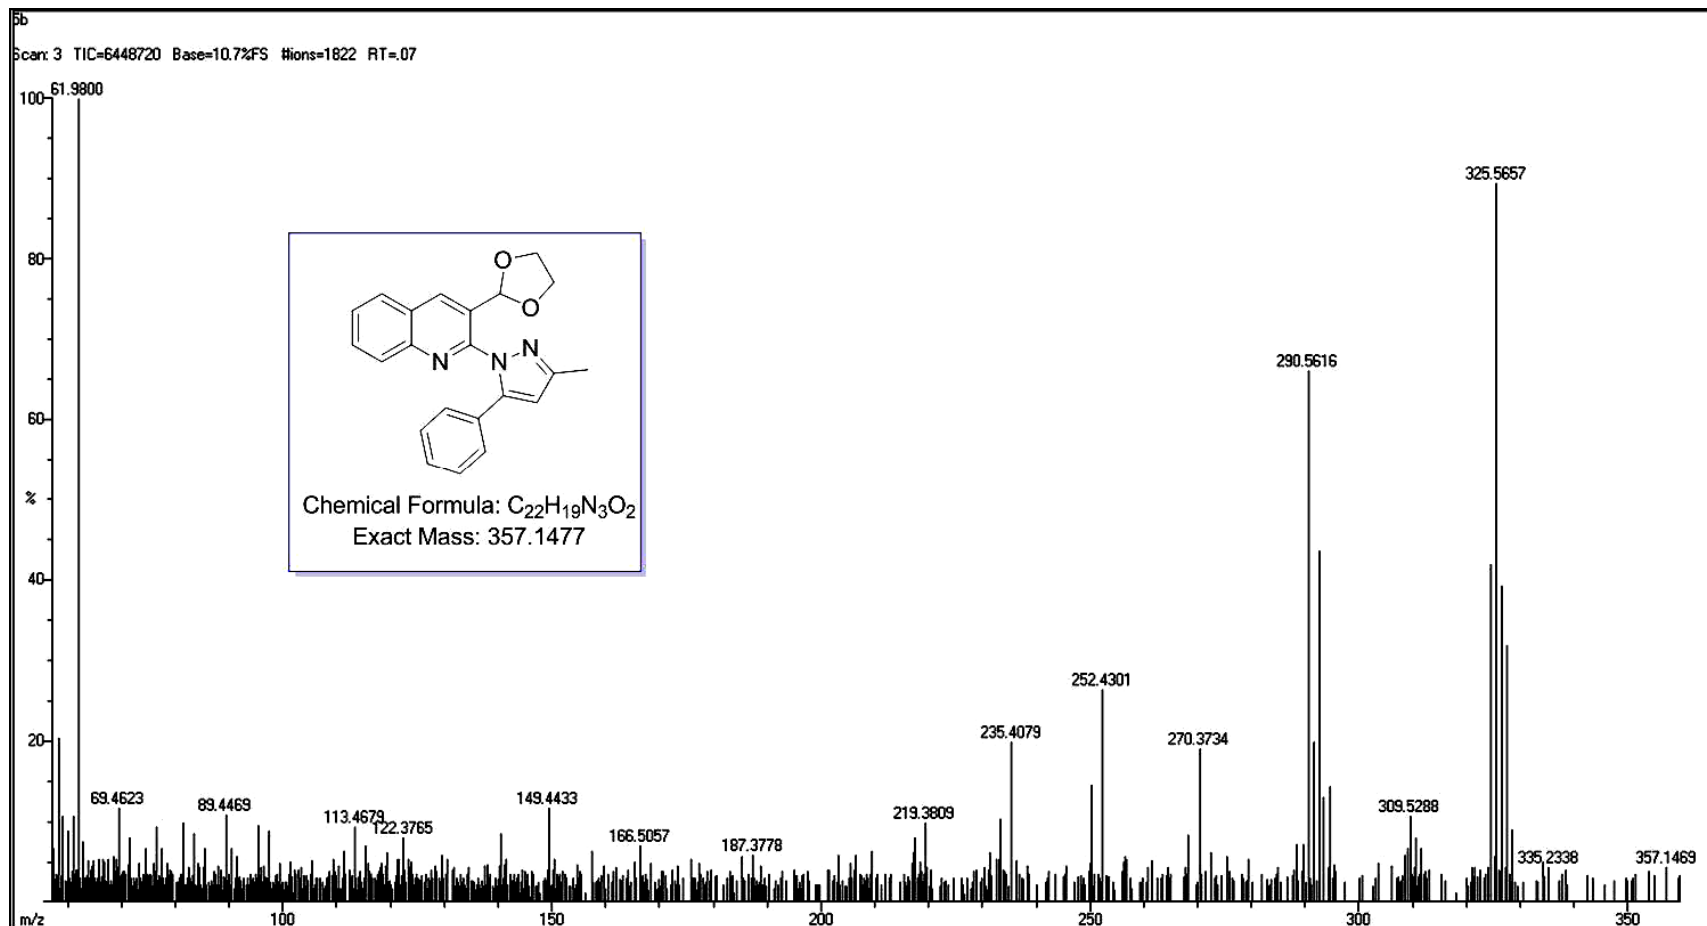

**Fig. 12:** HRMS-spectrum 3-(1,3-dioxolan-2-yl)-2-(3-methyl-5-phenyl-1H-pyrazol-1-yl)quinoline, **5b**

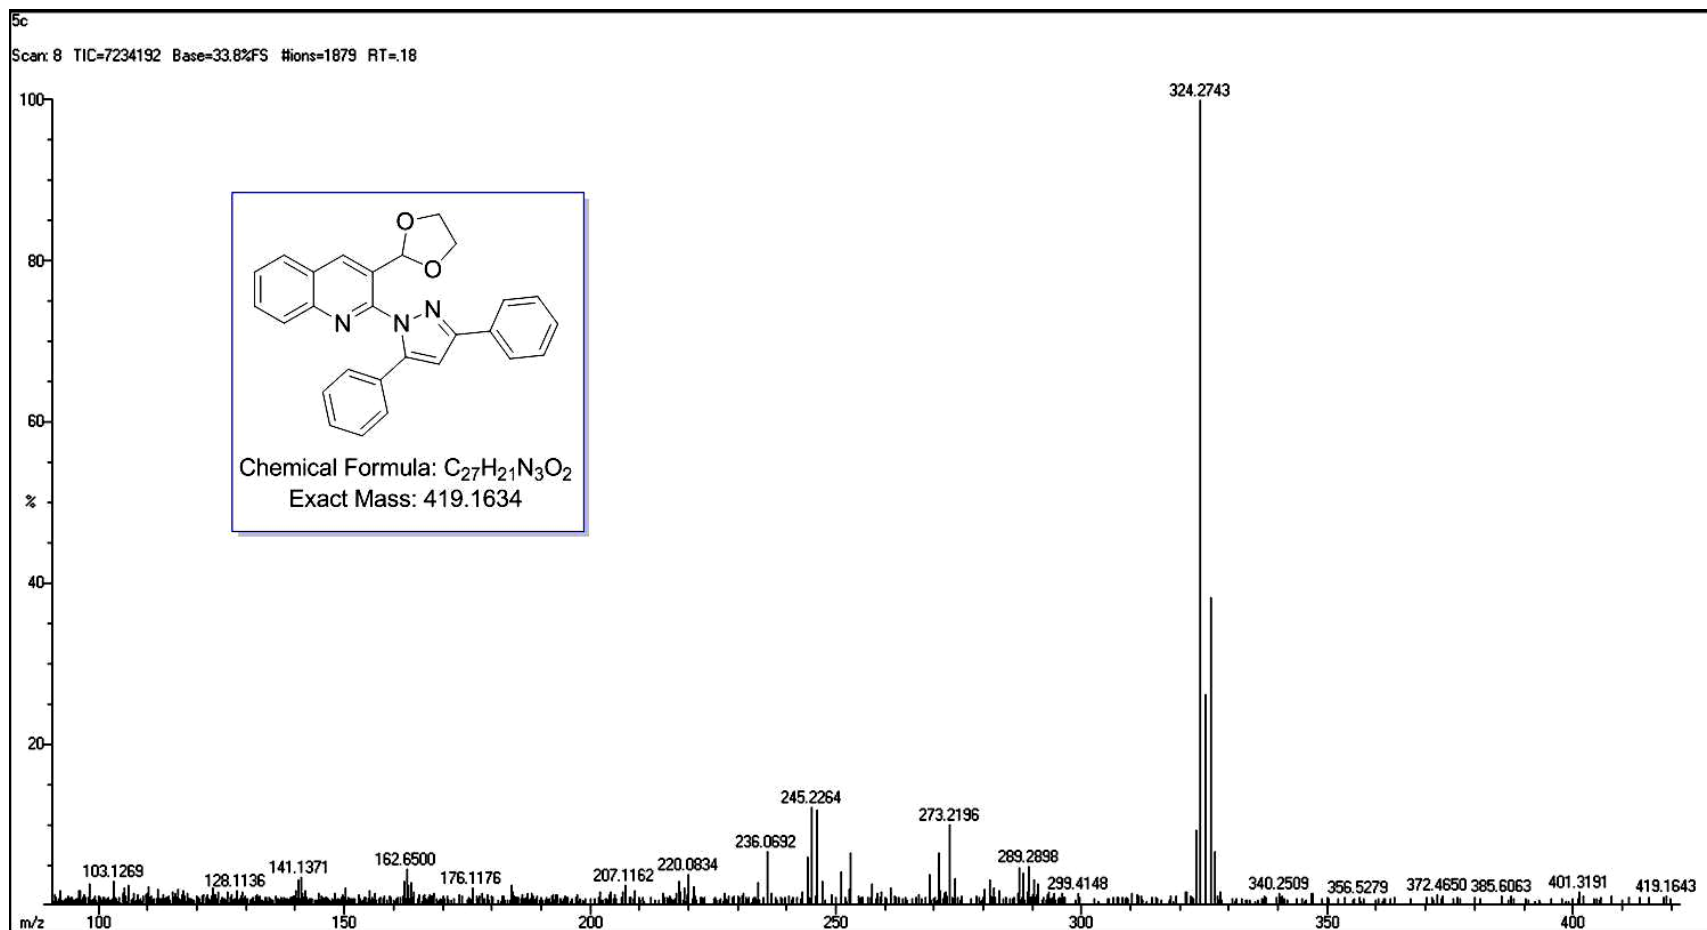

Fig. 13: HRMS-spectrum 3-(1, 3-dioxolan-2-yl)-2-(3,5-diphenyl-1H-pyrazol-1-yl)quinoline, **5c**

5D

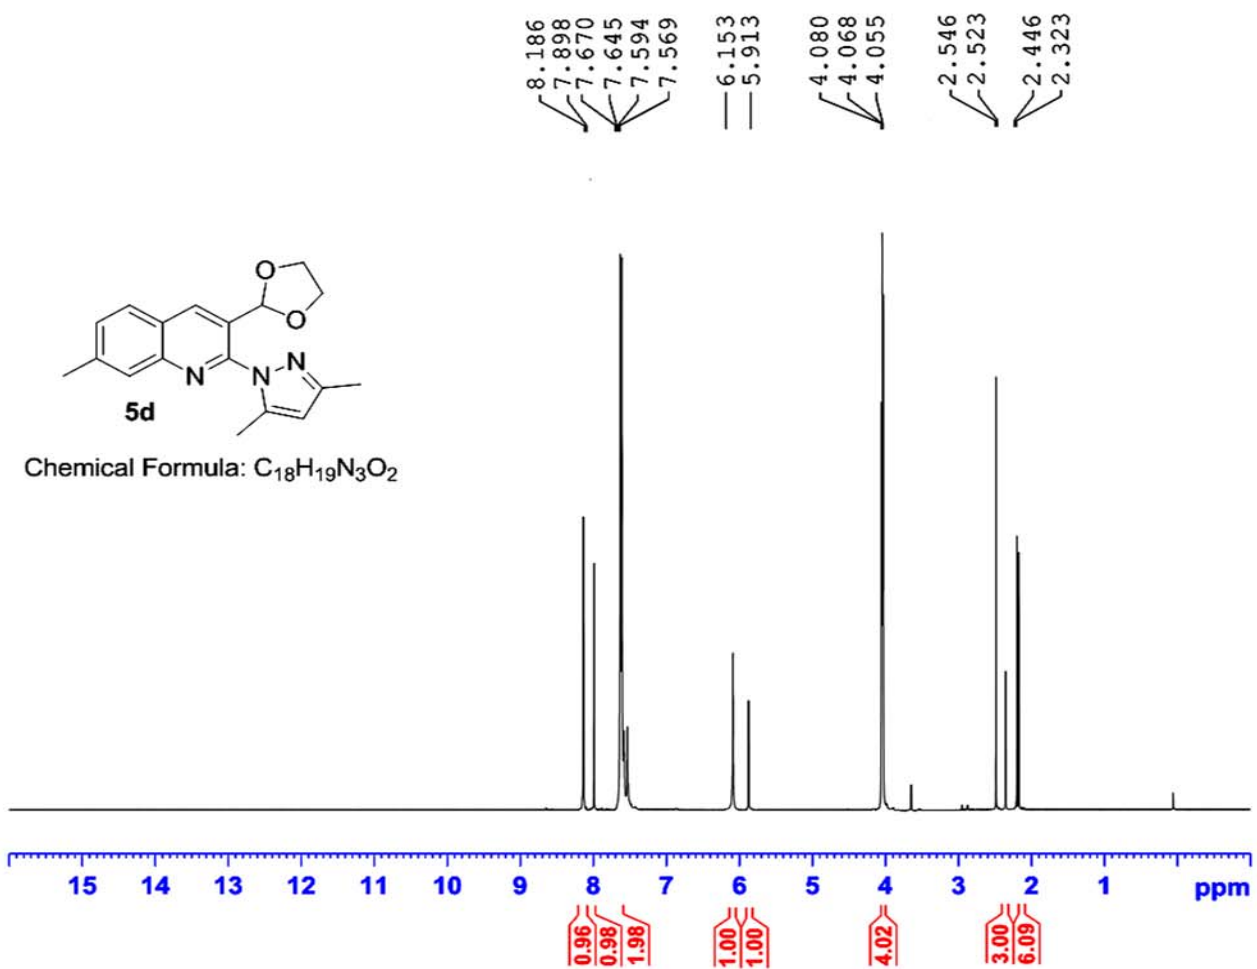

**Fig. 14:**  $^1H$ -NMR- spectrum of 2-(3,5-dimethyl-1H-pyrazol-1-yl)-3-(1,3-dioxolan-2-yl)-7-methylquinoline, **5d**

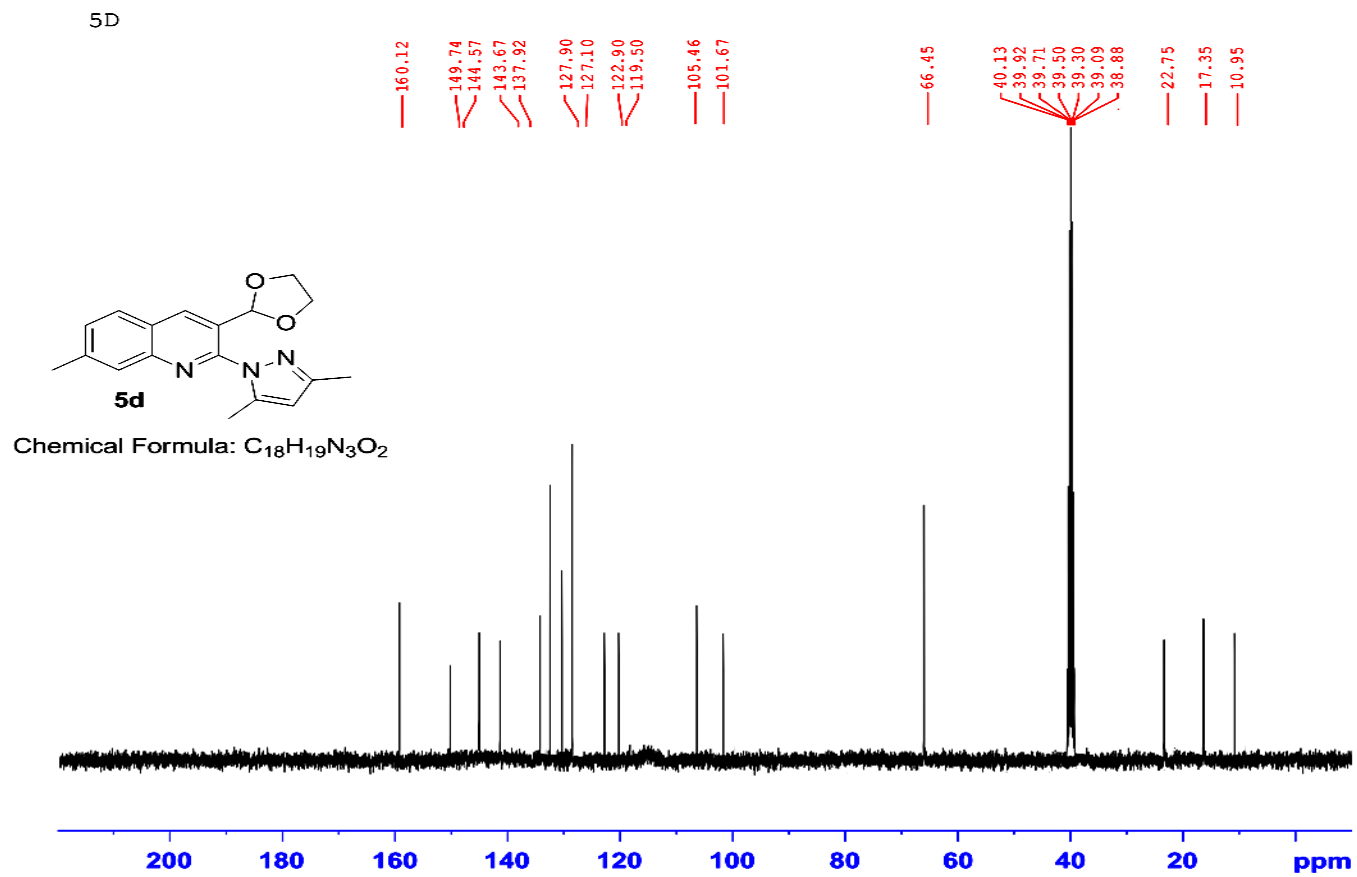

**Fig. 15:** <sup>13</sup>C-NMR- spectrum of 2-(3,5-dimethyl-1H-pyrazol-1-yl)-3-(1,3-dioxolan-2-yl)-7-methylquinoline, **5d**

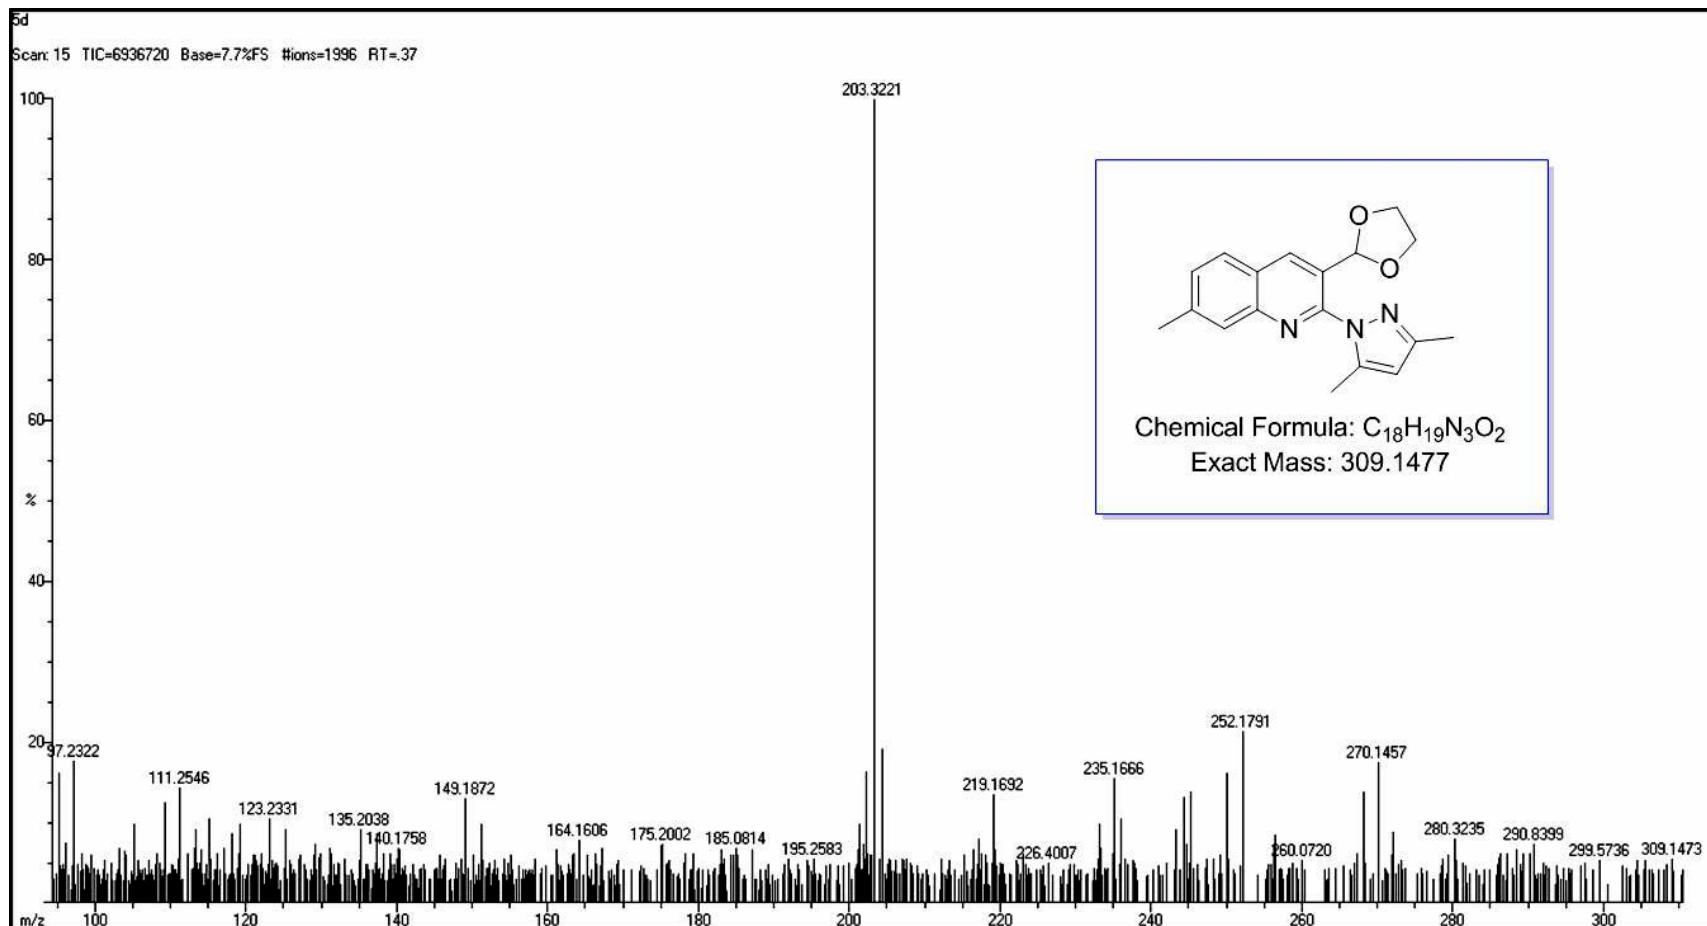

**Fig. 16:** HRMS-spectrum 2-(3, 5-dimethyl-1H-pyrazol-1-yl)-3-(1, 3-dioxolan-2-yl)-7-methyl quinoline, **5d**



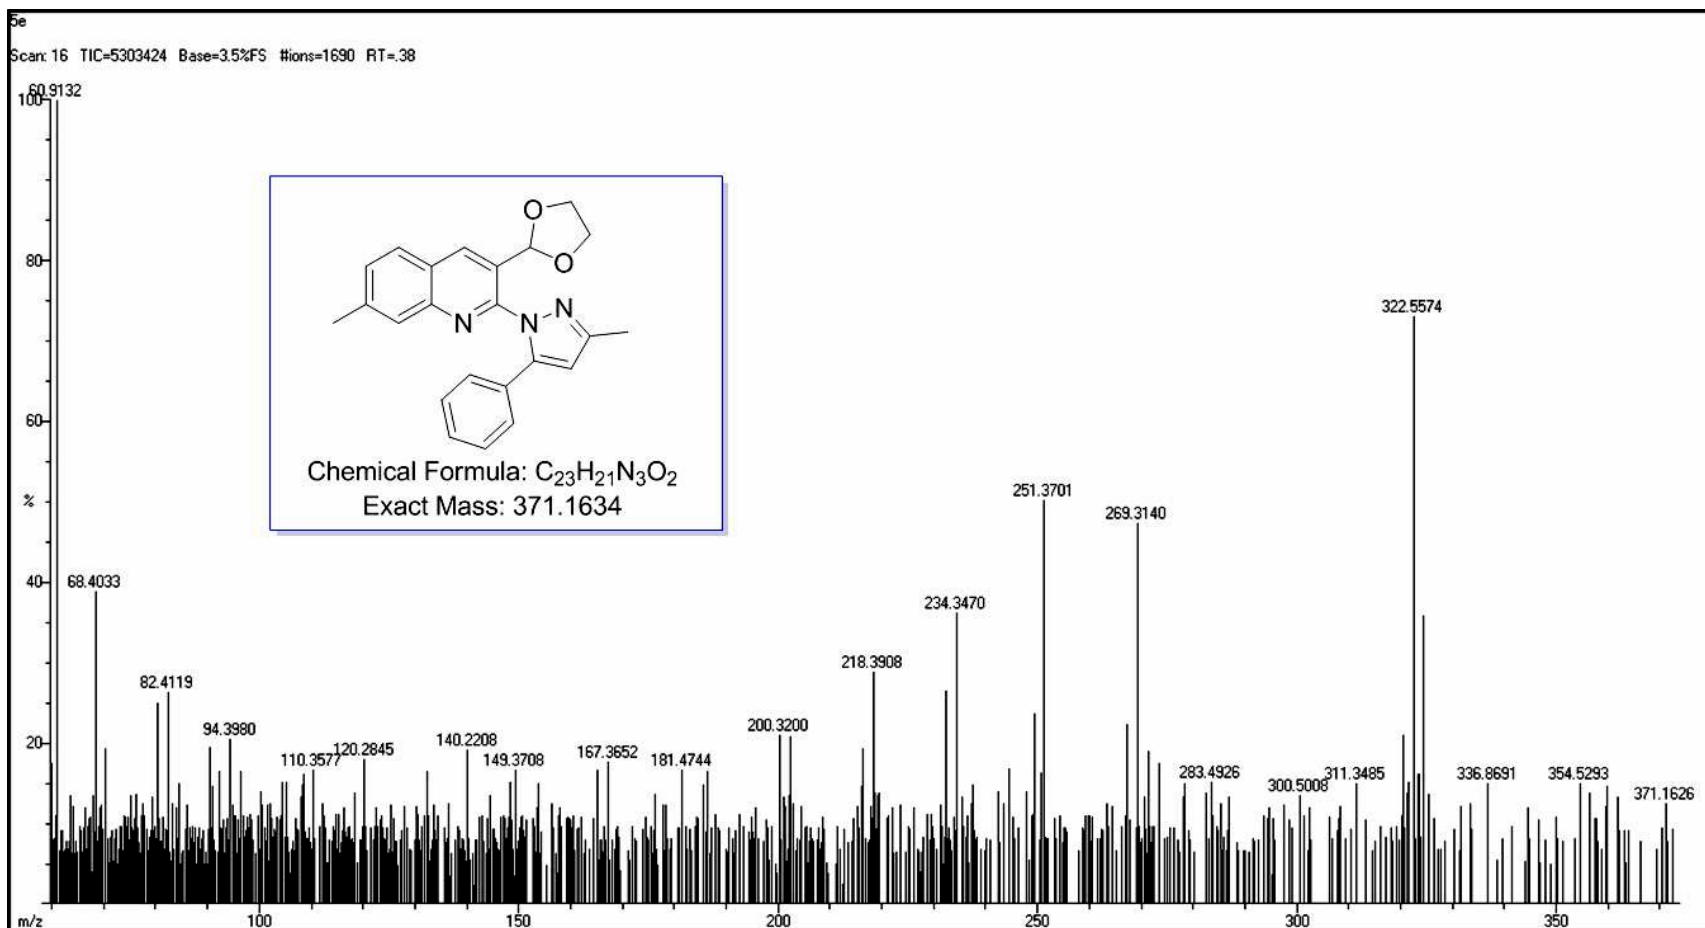

**Fig. 17:** HRMS-spectrum 3-(1,3-dioxolan-2-yl)-7-methyl-2-(3-methyl-5-phenyl-1H-pyrazol-1-yl)quinoline, **5e**

5F

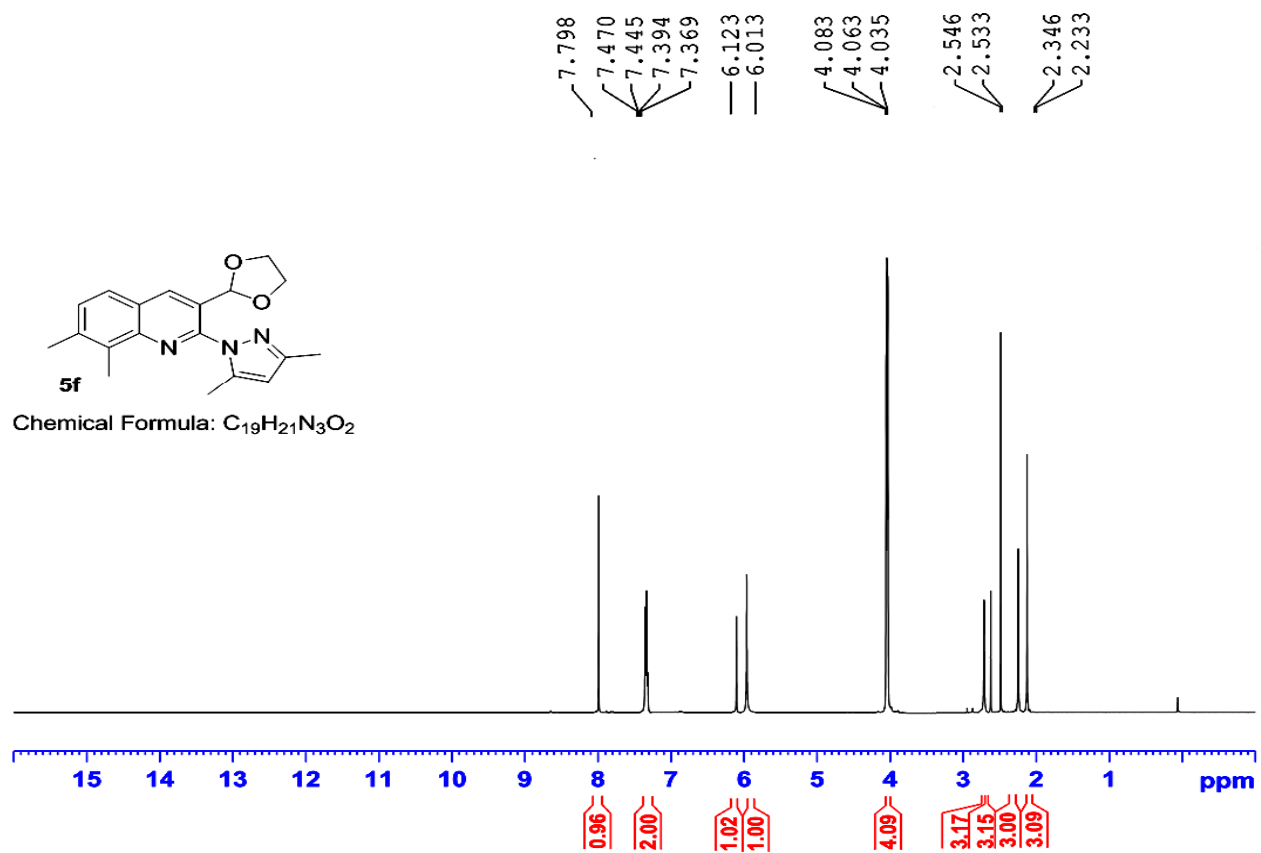

**Fig. 18:** <sup>1</sup>H-NMR- spectrum of 2-(3,5-dimethyl-1H-pyrazol-1-yl)-3-(1,3-dioxolan-2-yl)-7,8-dimethylquinoline, **5f**

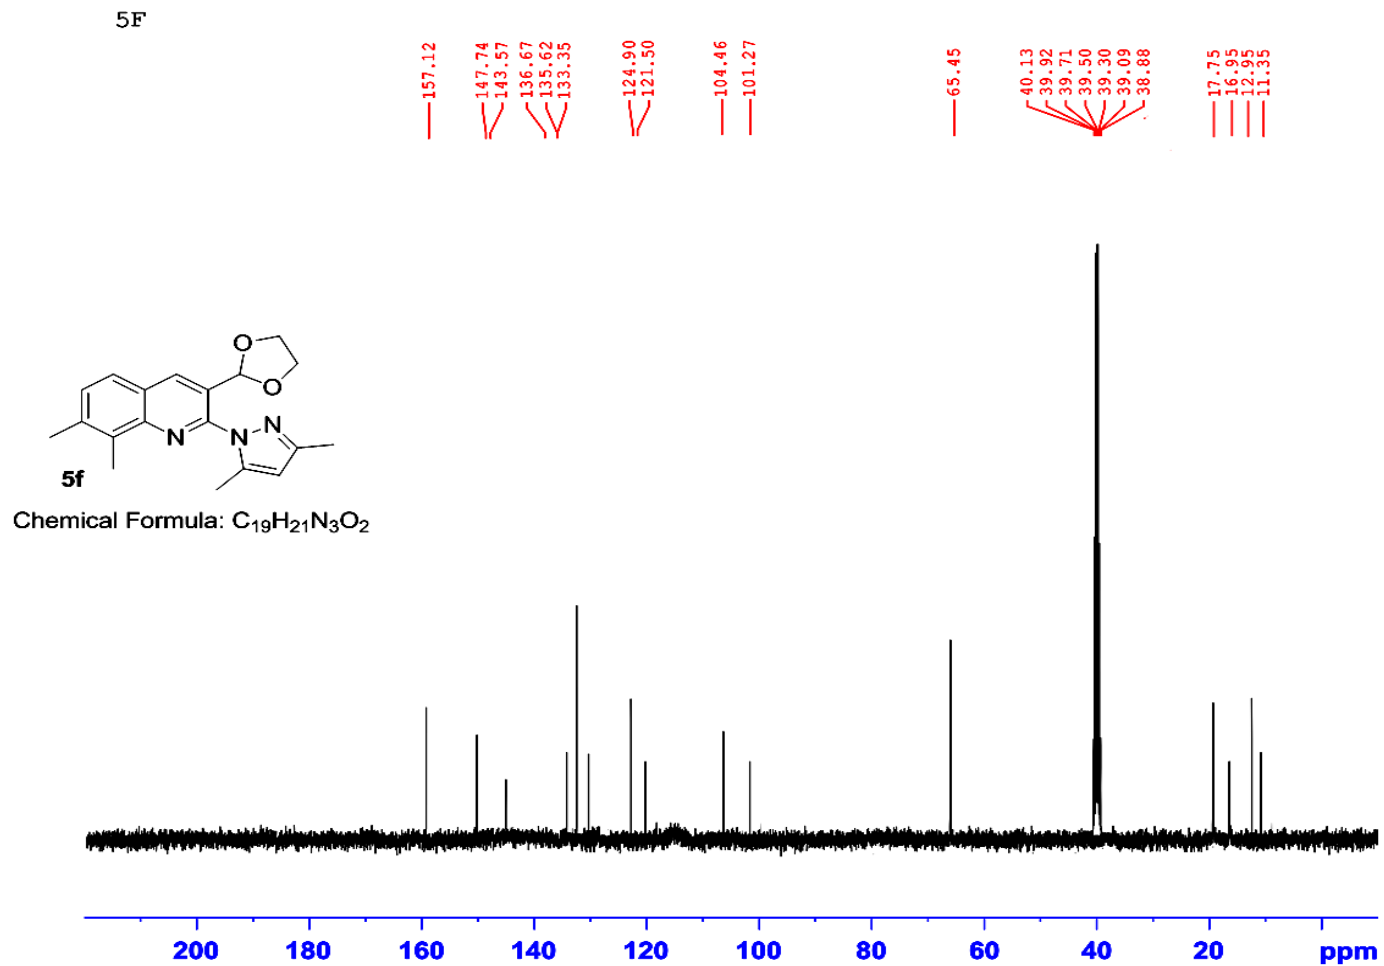

**Fig. 19:** <sup>13</sup>C-NMR- spectrum of 2-(3,5-dimethyl-1H-pyrazol-1-yl)-3-(1,3-dioxolan-2-yl)-7,8-dimethylquinoline, **5f**

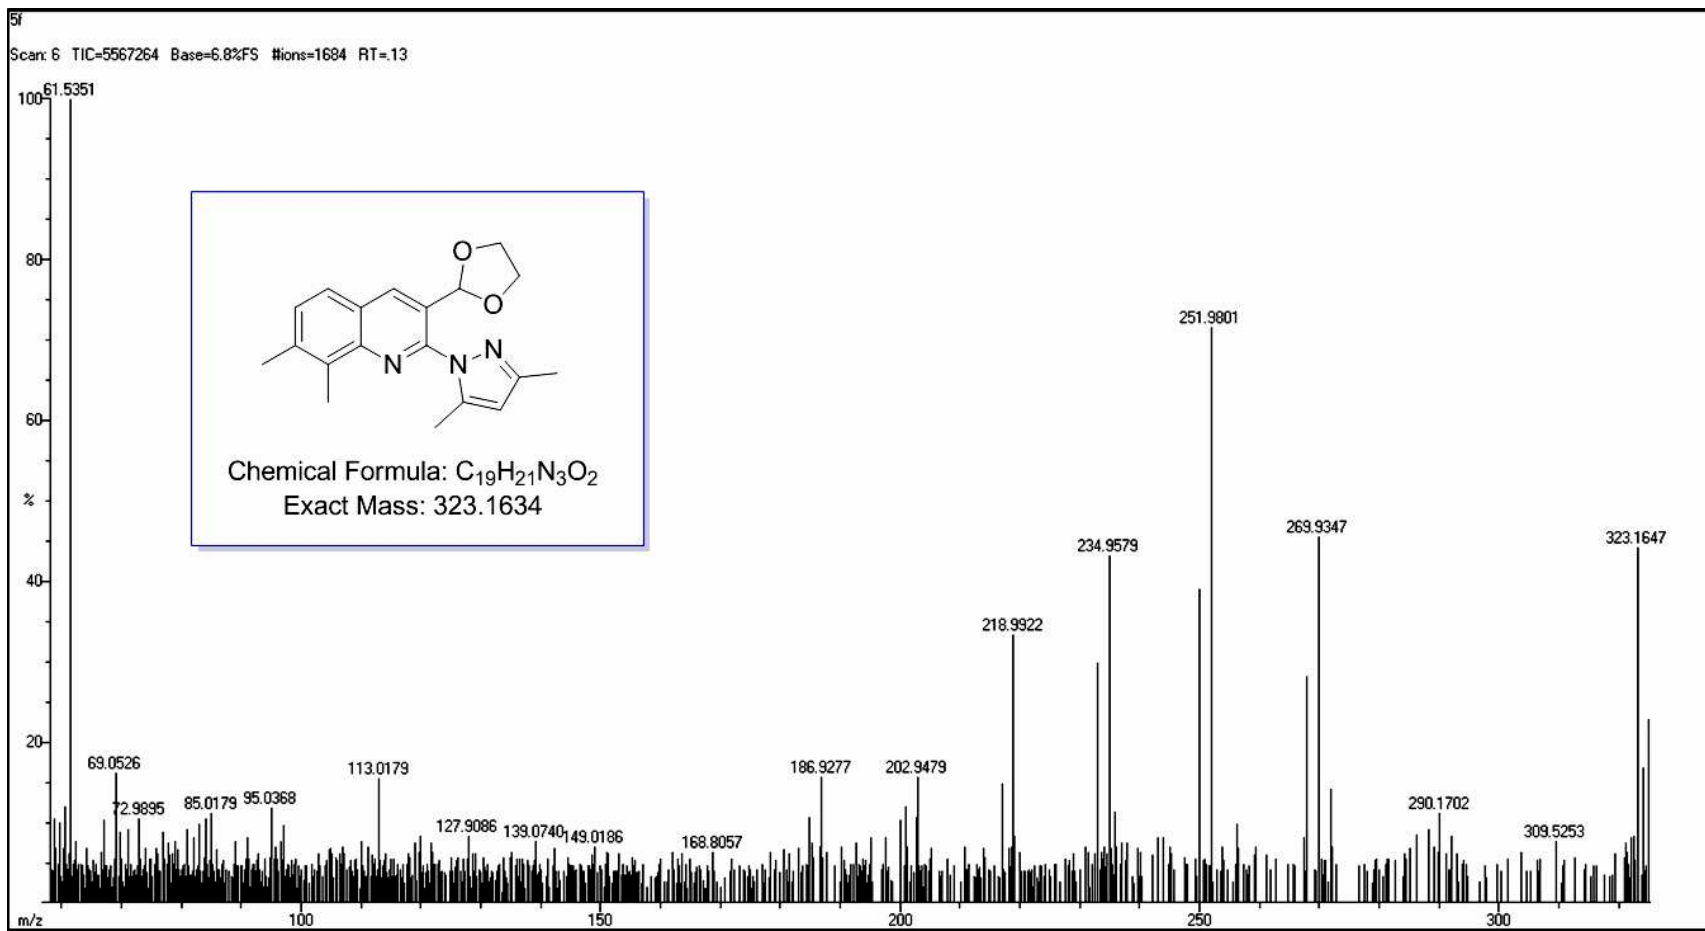

**Fig. 20:** HRMS-spectrum2-(3,5-dimethyl-1H-pyrazol-1-yl)-3-(1,3-dioxolan-2-yl)-7,8-dimethylquinoline, **5f**

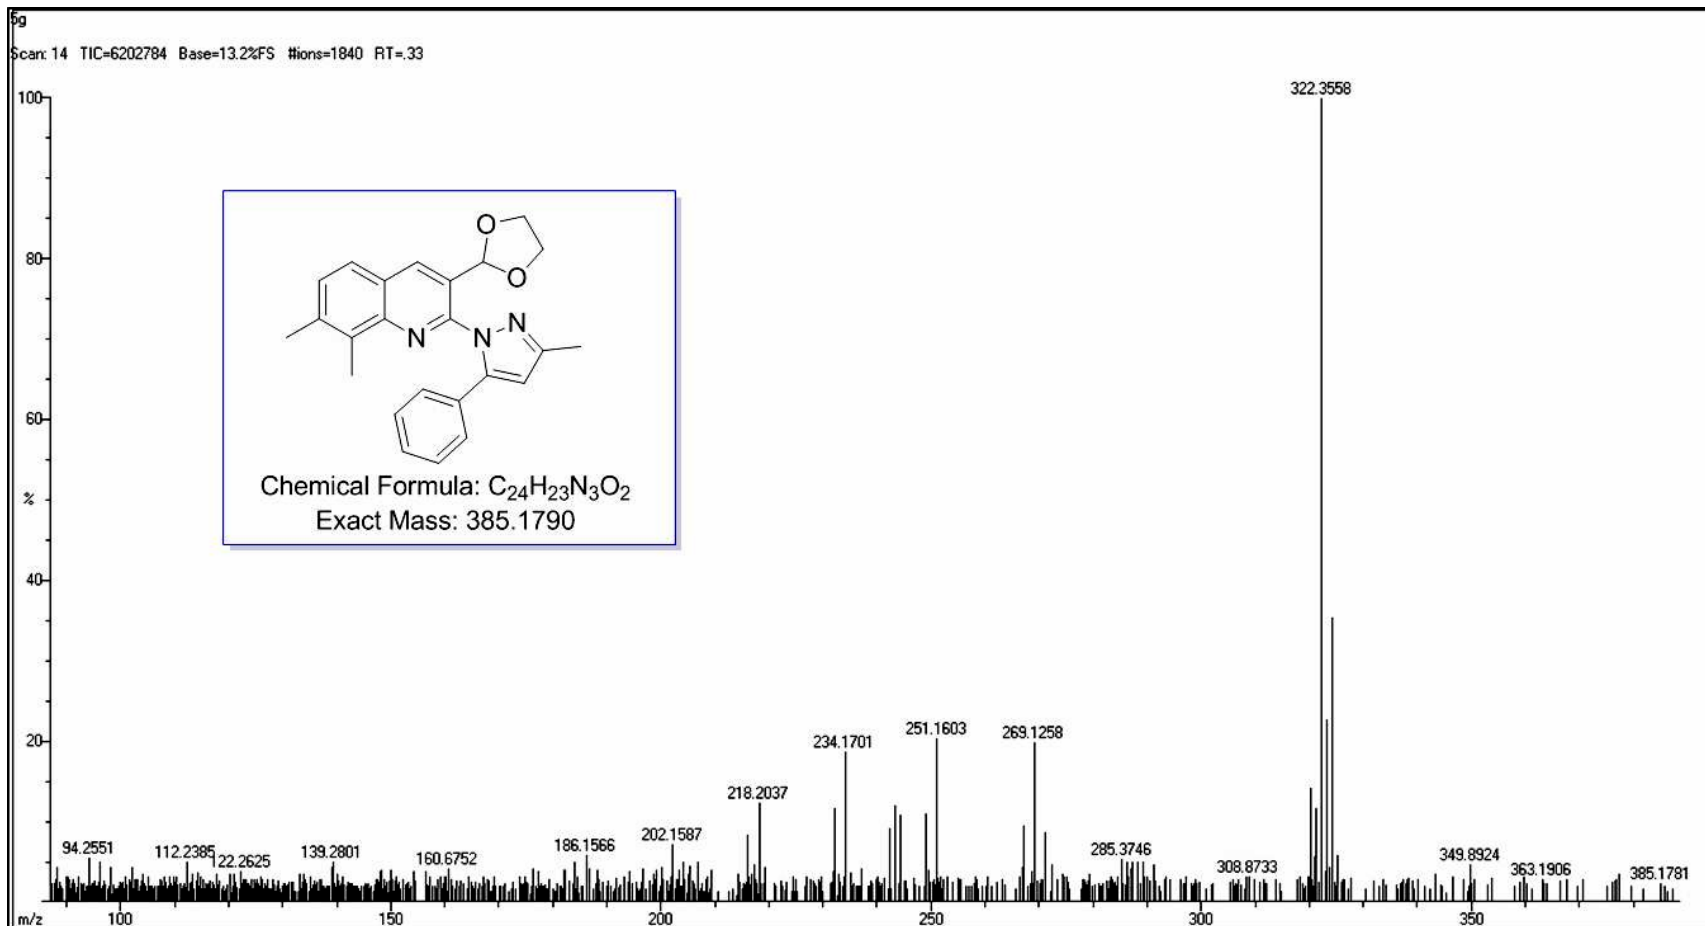

**Fig. 21:** HRMS-spectrum 3-(1,3-dioxolan-2-yl)-7,8-dimethyl-2-(3-methyl-5-phenyl-1H-pyrazol-1-yl)quinoline, **5g**
